# Supplementary material for: Histone Deacetylase 1 Depletion Activates Human Cardiac Mesenchymal Stromal Cell Proangiogenic Paracrine Signaling Through a Mechanism Requiring Enhanced Basic Fibroblast Growth Factor Synthesis and Secretion
Source: PubMed Central journal article supplement — J Am Heart Assoc. 2017 Jul 5;6(7):e006183. doi: 10.1161/JAHA.117.006183 (PMC5586316; doi:10.1161/jaha.117.006183), 2017-07-05
Supplement: JAH3-6-e006183-s001.pdf [file JAH3-6-e006183-s001.pdf]

# **SUPPLEMENTAL MATERIAL**

**Table S1.** shRNA vectors and shRNA-scramble controls utilized in experiments (Plasmids)

| shRNA constructs                                      | Product code   | Insert sequence (5' to 3')                                  | Company       |
|-------------------------------------------------------|----------------|-------------------------------------------------------------|---------------|
| pLenti6-NT shRNA (NT shRNA control)                   | N/A            | ACTACCGTTGTTATAGGTGTTCAAGAGACACCTATAACAACGGTAGTTTTTTGGAA    | N/A           |
| MISSION® HDAC1 shRNA                                  | TRCN0000195467 | CCGGCGGTTAGGTTGCTTCAATCTACTCGAGTAGATTGAAGCAACCTAACCGTTTTTTG | Sigma-Aldrich |
| MISSION® bFGF shRNA                                   | TRCN0000368438 | CCGGTATAGCTCAGTTTGGATAATTCTCGAGAATTATCCAAACTGAGCTATATTTTG   | Sigma-Aldrich |
| MISSION® pLKO.1-puro-CMV-TurboGFP™ (Positive control) | SHC003         | No shRNA insert                                             | Sigma-Aldrich |

**Table S2.** Gene specific primers with respective annealing temperatures (Primers)

| Target                   | Identifier | Sequence (5' to 3')    | Species    | Amplicon (bp) | Annealing Temp. (°C) |
|--------------------------|------------|------------------------|------------|---------------|----------------------|
| <b>Paracrine factors</b> |            |                        |            |               |                      |
| Ang-1 (qPCR)             | Ang-1 fwd  | TGCCAGAACCCAAAAAGGTGT  | Human cDNA | 143           | 60                   |
|                          | Ang-1 rev  | TTCACCGGAGGGATTCCAA    | Human cDNA | 143           | 60                   |
| PDGFA (qPCR)             | PDGFA fwd  | AAGCAGCCAACCAGATGTGA   | Human cDNA | 133           | 60                   |
|                          | PDGFA rev  | GGAGGAGAACAAAGACCGCA   | Human cDNA | 133           | 60                   |
| VEGFA (qPCR)             | VEGFA fwd  | CTCCACCATGCCAAGTGGTC   | Human cDNA | 105           | 60                   |
|                          | VEGFA rev  | GCAGTAGCTGCGCTGATAGA   | Human cDNA | 105           | 60                   |
| bFGF (qPCR)              | bFGF fwd   | GCTGTACTGCAAAAACGGGG   | Human cDNA | 94            | 60                   |
|                          | bFGF rev   | TAGCTTGATGTGAGGGTCGC   | Human cDNA | 94            | 60                   |
| HGF (qPCR)               | HGF fwd    | AACACAGCTTTTTGCCTTCG   | Human cDNA | 180           | 60                   |
|                          | HGF rev    | AACTCTCCCCATTGCAGGTC   | Human cDNA | 180           | 60                   |
| SCF (qPCR)               | SCF fwd    | CCTGAGAAAAGGGAAGGCCAAA | Human cDNA | 110           | 60                   |
|                          | SCF rev    | AAGGCTCCAAAAGCAAAGCC   | Human cDNA | 110           | 60                   |
| SDF1 (qPCR)              | SDF1 fwd   | TGCCCTTCAGATTGTAGCCC   | Human cDNA | 145           | 60                   |
|                          | SDF1 rev   | CGAGTGGGTCTAGCGGAAAG   | Human cDNA | 145           | 60                   |
| <b>HDAC transcripts</b>  |            |                        |            |               |                      |
| HDAC1 (qPCR)             | HDAC1 fwd  | TCAAGCCGGTCATGTCCAAA   | Human cDNA | 178           | 64                   |
|                          | HDAC1 rev  | CCTCCCAGCATCAGCATAGG   | Human cDNA | 178           | 64                   |

**Table S3.** Antibodies with corresponding dilutions

| <b>Antibody</b>                          | <b>Supplier</b>           | <b>Catalogue #</b> | <b>Dilution</b> |
|------------------------------------------|---------------------------|--------------------|-----------------|
| bFGF (19A9) Rabbit mAb                   | Cell Signaling Technology | 3196               | 1:2000          |
| Histone Deacetylase 1 (HDAC1) Rabbit pAb | Cell Signaling Technology | 2062               | 1:1000          |
| $\beta$ -Actin Mouse mAb                 | Ambion                    | AM4302             | 1:5000          |
